# Supplementary material
Source: PubMed Central journal article supplement (PMC2679460)
Supplement: M809244200_1.pdf [file M809244200_1.pdf]

## Supplemental Figure 1

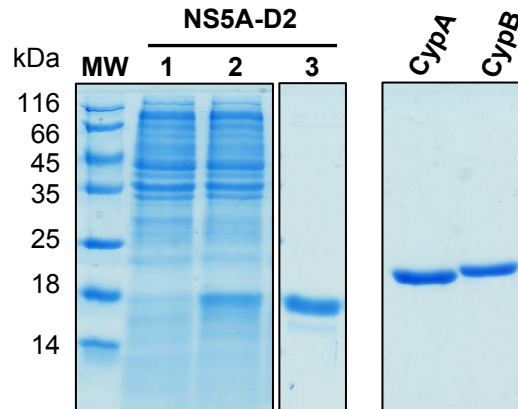

### **Expression and purification of domain 2 of NS5A and Cyclophilins.**

Recombinant proteins were analyzed by 15% SDS-PAGE and stained with Coomassie blue. Lane 1, total cell extract of *E. coli* electroporated with pT7-7-NS5A-D2 plasmid before and after, Lane 2, induction of expression. Lane 3, purified recombinant [<sup>15</sup>N,<sup>13</sup>C]-labelled NS5A-D2 (11.6kDa). The minor band in the SDS-PAGE is a proteolytic product of the D2 domain that we identified by mass spectroscopy (data not shown). CypA and CypB correspond to the purified recombinants Cyclophilin A (20.1kDa with HisTag) and Cyclophilin B (20.36kDa).

## Supplemental Table 1.

| NS5A-D2 min. | <sup>1</sup> HN (ppm) | <sup>15</sup> N (ppm) | <sup>13</sup> C <sub>α</sub> (ppm) | <sup>13</sup> C <sub>β</sub> (ppm) | <sup>13</sup> CO (ppm) | % min. |
|--------------|-----------------------|-----------------------|------------------------------------|------------------------------------|------------------------|--------|
| Q267         | 7.745                 | 117.930               | 56.778                             | 29.375                             | 175.651                | 4.4    |
| T268         | 8.289                 | 115.570               | 61.704                             | 70.269                             | 173.558                | 8.1    |
| E271         | 8.767                 | 122.759               | 57.486                             | 30.152                             | 176.642                | 7.3    |
| R273         | 8.309                 | 124.049               | 56.204                             | 30.760                             | 174.869                | 6.4    |
| V274         | 7.852                 | 119.408               | 59.129                             | 34.228                             | 174.567                | 7.6    |
| V276         | 8.168                 | 124.467               | 62.714                             | 32.525                             | 176.289                | 7.5    |
| L277         | 8.278                 | 125.881               | 54.727                             | 42.700                             | 176.664                | 9.1    |
| L280         | 8.087                 | 123.768               | 54.955                             | 42.933                             | 175.787                | 8.4    |
| E281         | 7.937                 | 120.648               | 53.872                             | 30.938                             | 174.592                | 11.9   |
| M283         | 8.624                 | 121.590               | 55.888                             | 33.251                             | 175.883                | 7.1    |
| L290         | 8.045                 | 121.861               | 55.311                             | 42.766                             | 176.438                | 9.1    |
| S293         | 8.546                 | 117.165               | 58.402                             | 63.817                             | 174.356                | 9.8    |
| I294         | 8.030                 | 122.238               | 58.200                             | 40.431                             | 174.873                | 6.9    |
| S296         | 8.617                 | 116.570               | 58.896                             | 64.190                             | 175.089                | 4.7    |
| E297         | 8.708                 | 122.768               | 56.972                             | 29.797                             | 176.438                | 8.5    |
| L300         | 7.958                 | 122.093               | 52.756                             | 43.206                             | 175.522                | 13.6   |
| R302         | 8.712                 | 121.534               | 56.704                             | 30.418                             | 176.588                | 12.4   |
| A311         | 8.629                 | 124.146               | 53.376                             | 18.507                             | 177.463                | 8.3    |
| W312         | 7.287                 | 114.668               | 56.449                             | 28.874                             | 175.829                | 10.2   |
| A313         | 7.518                 | 124.740               | 51.887                             | 19.351                             | 176.622                | 11.6   |
| D316         | 8.289                 | 118.686               | 53.943                             | 40.867                             | 175.548                | 12.0   |
| W325         | 7.770                 | 121.081               | 57.184                             | 29.198                             | 175.840                | 6.4    |
| R326         | 7.634                 | 122.381               | 55.880                             | 30.511                             | 176.660                | 8.3    |
| D329         | 8.316                 | 119.212               | 53.473                             | 40.750                             | 174.477                | 6.9    |
| Y330         | 7.836                 | 120.158               | 57.832                             | 38.815                             | 174.565                | 5.5    |
| Q331         | 7.986                 | 124.351               | 52.965                             | 29.280                             | 172.528                | 6.5    |
| A339         | 8.356                 | 126.985               | 52.332                             | 19.232                             | 176.046                | 17.0   |
| L340         | 7.894                 | 120.056               | 52.725                             | 42.943                             | 175.945                | 8.2    |
| L342         | 8.573                 | 121.958               | 55.685                             | 42.184                             | 177.509                | 12.7   |

**Assignments and quantifications of minor NMR resonances in NS5A-D2 <sup>1</sup>H-<sup>15</sup>N-HSQC spectrum.** Because of the low amide proton dispersion in the proton dimension, percentages for minor resonances compared to the corresponding major peaks were measured using maximal peak intensities rather peak integrals.

## Supplemental Figure 2

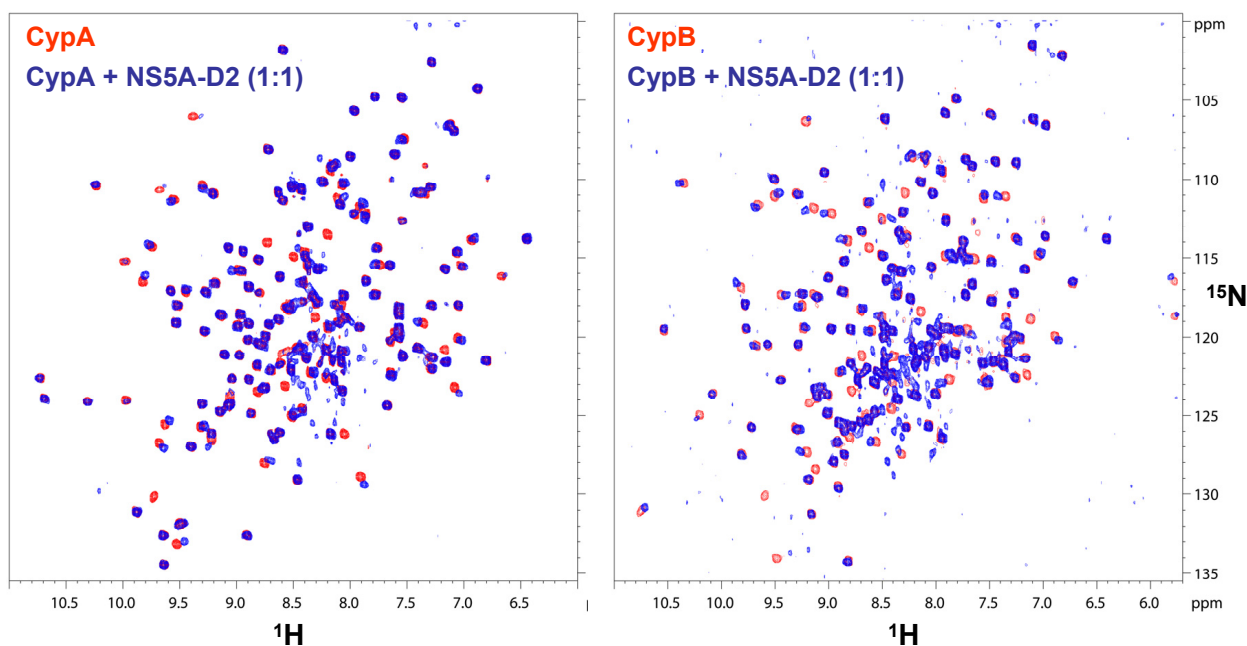

**Interaction of human Cyclophilins with NS5A-D2.** Each panel corresponds to the superimposition of two  $[^1\text{H}, ^{15}\text{N}]$ -planes extracted from HNCO spectra. The first one, in red, was acquired on the  $[^{15}\text{N}, ^{13}\text{C}]$ -cyclophilin alone, CypA on the left and CypB on the right, whereas the second one, in blue, was acquired on a mixture of  $[^{15}\text{N}, ^{13}\text{C}]$ -Cyclophilin and  $[^{15}\text{N}]$ -NS5A-D2 in a molar ratio of 1:1. Addition of NS5A-D2 to CypB or CypA samples induces perturbations of chemical shifts and thus proving a direct interaction between these proteins.

## Supplment Figure 3

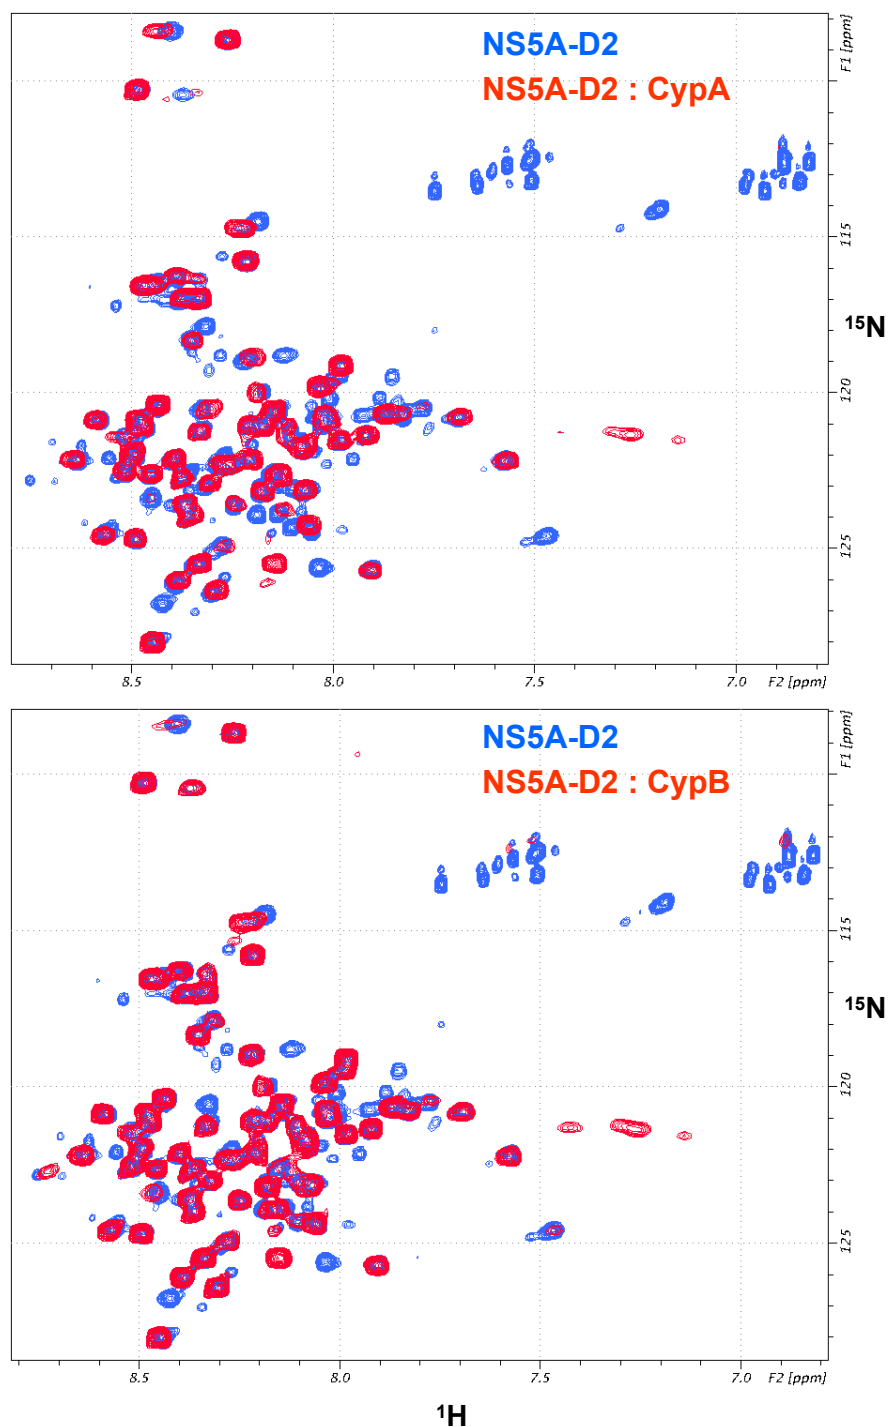

**Interaction of NS5A-D2 with CypA and CypB.** Each panel corresponds to the superimposition of a  $[^1\text{H}, ^{15}\text{N}]$ -HSQC spectrum, in blue, acquired on NS5A-D2 alone and of a  $[^1\text{H}, ^{15}\text{N}]$ -plane extracted from HNnoCO spectrum that specifically select the NS5A-D2 sub-spectrum in a NS5A-D2/Cyp (1:1) sample. Addition of Cyps causes intensive line broadening of resonances corresponding to NS5A-D2 populations where proline residues are in *cis* conformation. Furthermore several NS5A-D2 residues, in the *trans* populations, are differentially affected following addition of CypA or CypB.

# Supplemental Figure 4

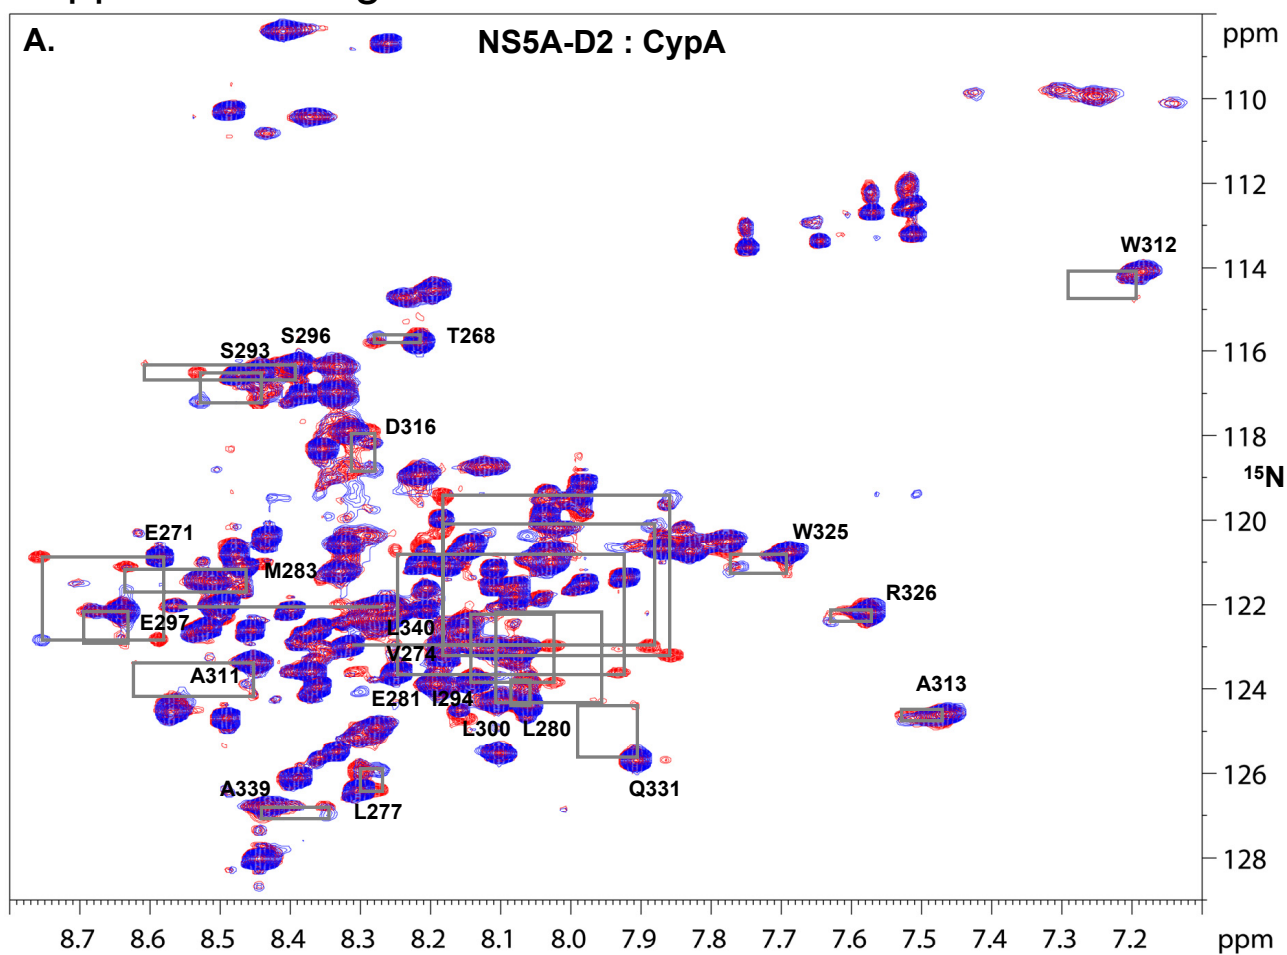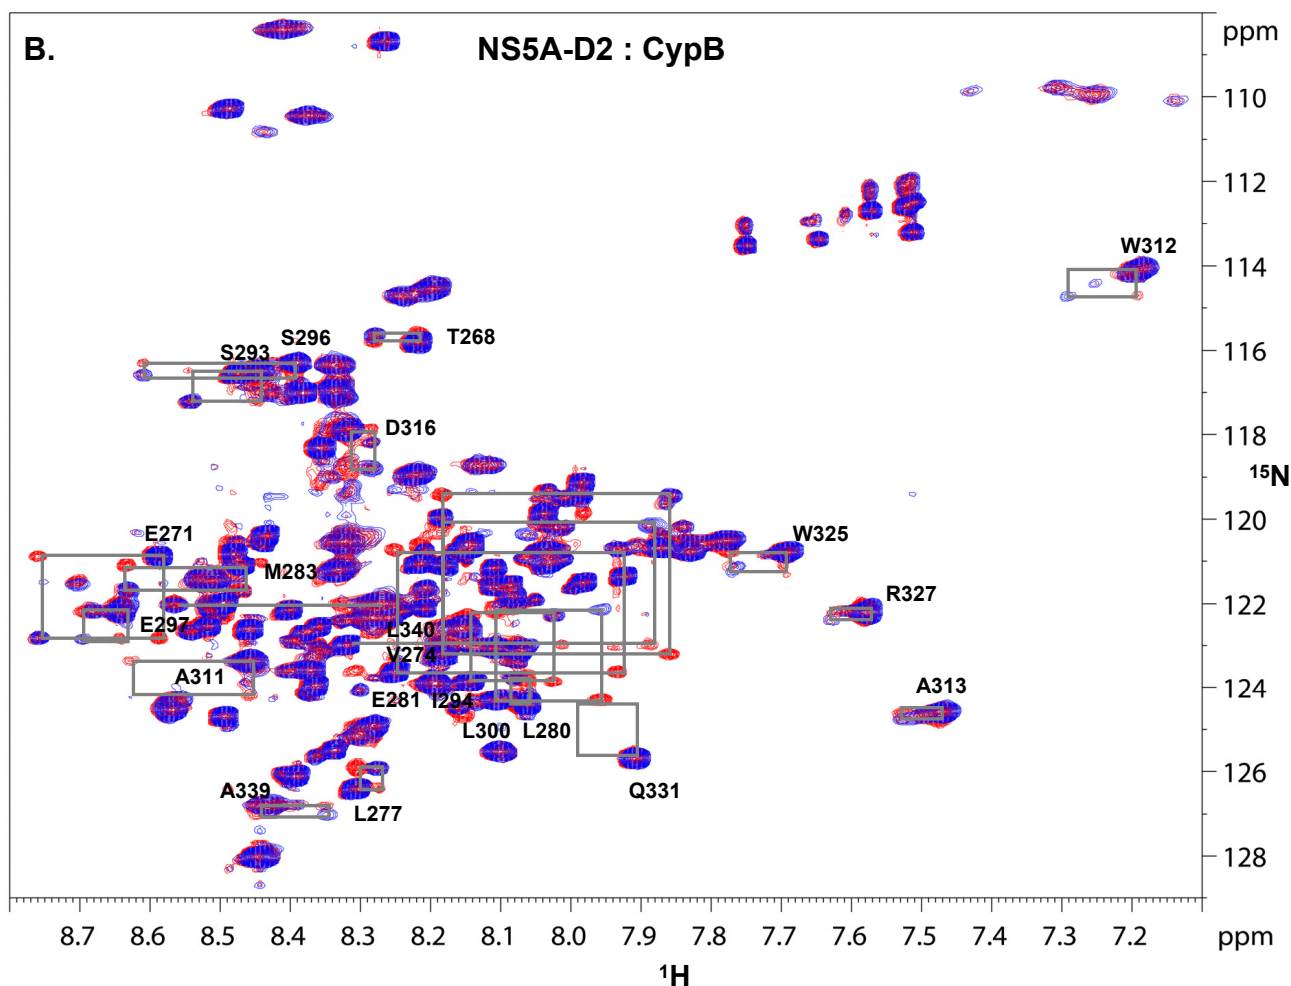

***Cis/trans* isomerization of NS5A-D2 X-Pro peptide bonds catalyzed by CypA and CypB.**  $^1\text{H}$ ,  $^{15}\text{N}$  heteronuclear exchange spectra recorded with mixing times of 0.88ms, in blue, and 100ms, in red, on [ $^{15}\text{N}$ ]-NS5A-D2 samples (220 $\mu\text{M}$ ) with catalytic amount of either CypA (**A.**) or CypB (**B.**) (23 $\mu\text{M}$ ). The NMR resonances (*trans*, *cis* and the two exchange peaks) of NS5A-D2 residues for which the PPIase activity of a cyclophilin can be evidenced are connected by gray boxes. Exchange spectra were acquired on a 800MHz.

## Supplemental Figure 5

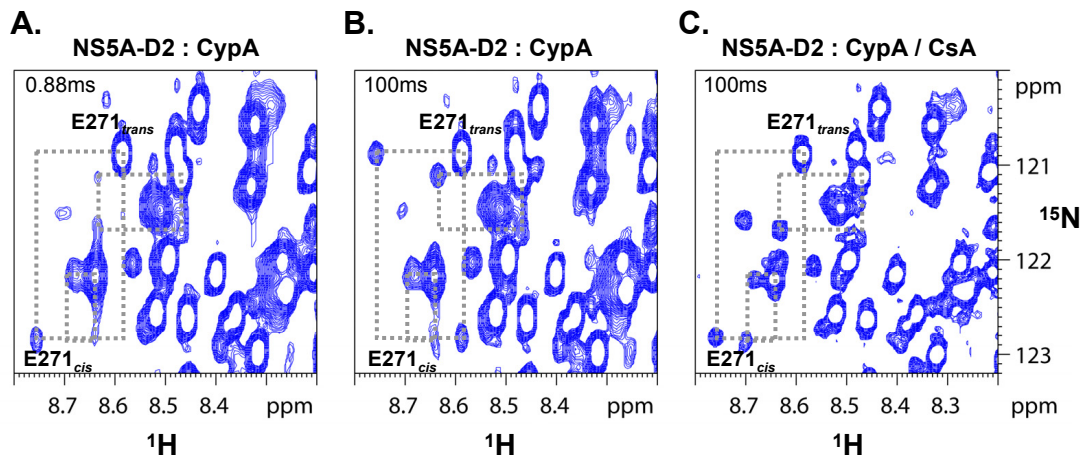

**Inhibition of PPIase activity of CypA on NS5A-D2.**  $^1\text{H}$ ,  $^{15}\text{N}$  heteronuclear exchange spectra were acquired with mixing times of 0.88ms (A.) and 100ms (B., C.) on a NS5A-D2:CypA (220 $\mu\text{M}$ :23 $\mu\text{M}$ ) sample without (B.) or with an excess of CsA (C.). The NS5A-D2 exchange peaks due to CypA catalyzed isomerizations are no more detectable in presence of CsA, an inhibitor of cyclophilins PPIase activity.
